# Supplementary material for: Metabolites Interrogation in Cell Fate Decision of Cultured Human Corneal Endothelial Cells
Source: PubMed Central journal article supplement — Invest Ophthalmol Vis Sci. 2020 Feb 12;61(2):10. doi: 10.1167/iovs.61.2.10 (PMC7324440; doi:10.1167/iovs.61.2.10), 2020-02-12
Supplement: iovs-61-2-10_s001.pdf [file iovs-61-2-10_s001.pdf]

# Supplementary Fig.1

C23 P2, Day 39

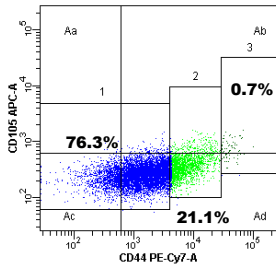

**CD26/CD44**

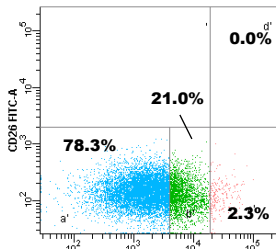

C32 P2, Day 53

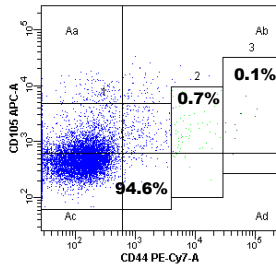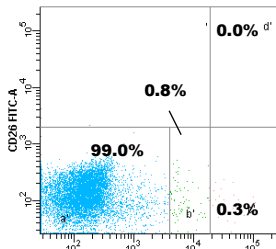

C33 P2, Day55

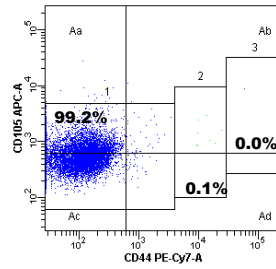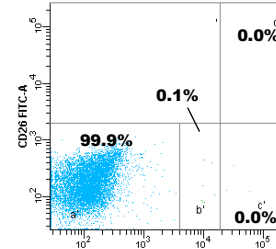

**MHC class I**

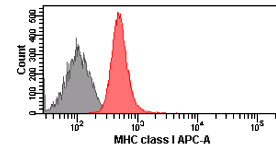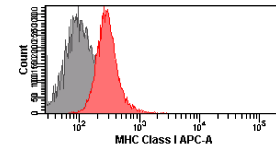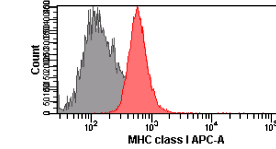

**MHC class II**

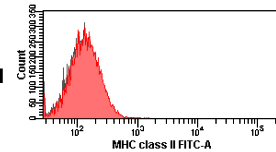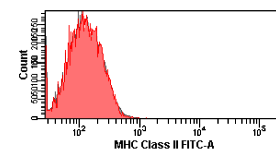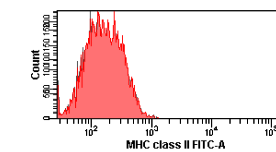

**PD-L1**

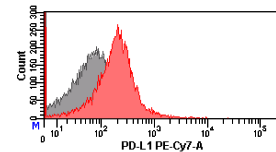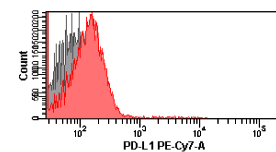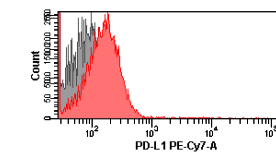

**SUPPLEMENTARY FIGURE 1.** Contrasting expression of CD166, CD24, CD44 and CD105 in three different lots of cHCECs. The expression of CD166, CD24, CD44 and CD105 was analyzed by use of a FACSCanto II Flow Cytometry System. After gating for CD166+CD24- or CD166+CD24+, the following two SPs were defined: CD166+CD24-CD44-/+ CD105+/-SP and CD166+CD24-CD44++CD105+SP. The E-ratios were 76.3, 94.6, and 99.2% for C23, C32, and C33, respectively. For all, the number of culture passages was 2. The donor information is shown in the legend of Figure 1.
