# Supplementary material for: Metabolites Interrogation in Cell Fate Decision of Cultured Human Corneal Endothelial Cells
Source: PubMed Central journal article supplement — Invest Ophthalmol Vis Sci. 2020 Feb 12;61(2):10. doi: 10.1167/iovs.61.2.10 (PMC7324440; doi:10.1167/iovs.61.2.10), 2020-02-12
Supplement: iovs-61-2-10_s002.pdf [file iovs-61-2-10_s002.pdf]

Supplementary Fig.2

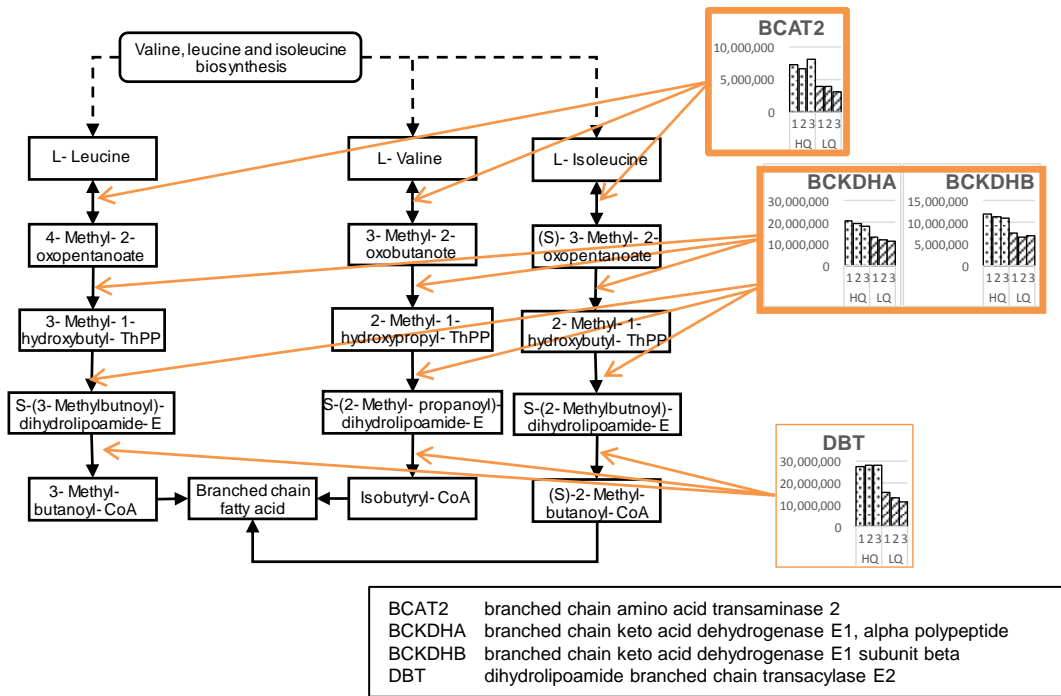

**SUPPLEMENTARY FIGURE 2.** The elevated expression of enzymes in valine, leucine, and isoleucine degradation
